# Supplementary material for: Illusory resizing of the painful knee is analgesic in symptomatic knee osteoarthritis
Source: PeerJ. 2018 Jul 17;6:e5206. doi: 10.7717/peerj.5206 (PMC6054060; doi:10.7717/peerj.5206)
Supplement: Supplemental Information 1 [file peerj-06-5206-s001.xlsx]

## Sheet: S1 and demographic
										Session 1																																		Session 2	Session 3
Part number	Participant_ID	Age	Gender	Knee tested	Height	Weight	Unilat_knee_pain	History of knee pain tested limb	History of knee pain unaffected limb	Avg pain last 48 hours	Max_pain_last_48	Min_pain_last_48	Current pain	Q1	Q2	Q3	Q4	Q5	Q6	Q7	Q8	Q9	Q10	Q11	Q12	Oxford knee score (Sum)	Knee_percept_Q1	Knee_percept_Q2	Knee_percept_Q3	Knee_percept_Q4	Knee_percept_Q5	Knee_percept_Q6	Knee_percept_Q7	Knee_percept_Q8	Knee_percept_Q9	Knee_percept_Score	Perceived knee size_small1	Perceived knee size_small2	Perceived knee size_smallavg	Perceived knee size_large1	Perceived knee size_large2	Perceived knee size_largeavg	Perceived knee size	Current_pain	Current pain
1	1	61.9274	1	0	157.5	120	1	3	0	47.5	80	15	10	0	2	1	2	1	1	0	1	1	3	3	2	17	0	2	0	2	0	0	3	0	0	7								50	70
2	2	66.7707	1	1	152	75.5	1	17.5	0	50	75	25	70	1	2	2	4	2	0	1	1	2	1	3	2	21	2	1	1	3	2	4	4	1	4	22								40	75
3	5	68.6762	0	1	180.3	86	1	33	0	10	20	0	10	3	3	2	3	2	3	2	4	2	3	4	4	35	2	3	0	1	0	0	3	0	3	12								10	15
4	6	79.5455	0	0	175.5	76	0	8	8	13	20	5	2	4	4	4	3	4	4	2	2	2	3	4	4	40	0	0	2	2	0	1	2	0	2	9								0	0
5	7	50.5161	1	0	169	94	0	5.5	5.5	80	100	0	0	1	3	2	3	2	1	0	0	2	2	4	2	22	0	2	1	0	0	0	2	0	2	7	0.8868	0.939	0.9129	1.11	1.1098	1.1099	1.0114	0	80
6	8	82	0	0	174	80	0	20	15	40	80	0	0	0	2	2	2	2	1	1	3	1	2	3	0	19	0	2	0	1	1	1	4	0	0	9	0.938	0.9602	0.9491	1.1196	1.1636	1.1416	1.04535	30	15
7	9	72	1	1	157.5	62	1	50	0	30	30	0	0	1	3	2	4	1	0	1	2	1	0	3	3	21	4	4	2	4	4	2	4	0	4	28	1.165	1.1348	1.1499	1.0972	0.9898	1.0435	1.0967	0	0
8	10	69.1225	1	1	160	89	1	15	0	50	75	0	0	1	4	3	2	3	0	1	4	2	4	2	2	28	0	0	0	0	0	0	3	0	1	4	0.9216	0.92	0.9208	1.1932	1.1786	1.1859	1.05335
9	11	55.1376	1	1	155	75	0	5	1	60	90	30	70	1	2	2	2	3	3	0	1	1	1	2	2	20	4	3	2	3	2	4	4	1	4	27	0.9824	0.9166	0.9495	1.068	1.102	1.085	1.01725
10	12	76.6516	1	1	167.6	70	0	15	12	35	50	0	0	2	4	3	3	2	2	1	4	2	3	4	2	32	1	2	1	0	0	0	2	0	2	8	1.0068	0.9894	0.9981	1.0002	0.8984	0.9493	0.9737
11	13	55.5647	1	0	189	99.9	1	0.83	0	75	90	0	0	1	3	2	1	1	0	0	0	0	1	1	2	12	2	4	3	2	2	1	4	0	4	22	0.9382	0.9258	0.932	1.0742	1.1252	1.0997	1.01585	25	75
12	14	69.1773	1	0	168.9	65	0	25	0.5	85	85	0	0	0	2	2	2	2	0	1	3	2	3	4	1	22	0	3	0	1	1	4	4	0	0	13	1.0232	1.0564	1.0398	1.25	1.25	1.25	1.1449	85	80

## Sheet: S1 - comparing diff illusion
	Real stretch			Real shrink			Asynch stretch			Asynch shrink			Tactile stretch			Tactile shrink			Visual stretch			Visual shrink			PRIMARY ANALYSIS:			Best multisensory			Appropriate tactile control			Appropriate visual control			Appropriate asynchronous (vision) control			Appropriate asynchronous (touch) control							EXPLORATORY ANALYSIS:
Part number	Pain before	Pain after	change	Pain before	Pain after	change	Pain before	Pain after	change	Pain before	Pain after	change	Pain before	Pain after	change	Pain before	Pain after	change	Pain before	Pain after	change	Pain before	Pain after	change				Pain before	Pain after	change	Pain before	Pain after	change	Pain before	Pain after	change	Pain before	Pain after	change	Pain before	Pain after	change		Perspective
1	15	8	-7	9	9	0	10	0	-10	5	10	5	15	8	-7	9	12	3	10	5	-5	15	12	-3			real stretch	15	8	-7	15	8	-7	10	5	-5	10	0	-10	5	10	5		0
2	60	59	-1	58	59	1	56	53	-3	60	61	1	60	60	0	58	60	2	56	56	0	58	59	1			real stretch	60	59	-1	60	60	0	56	53	-3	56	53	-3	60	61	1		0
3	20	15	-5	20	20	0	20	15	-5	20	20	0	20	15	-5	20	20	0	20	20	0	20	20	0			real stretch	20	15	-5	20	15	-5	20	20	0	20	15	-5	20	15	-5		0
4	5	5	0	5	5	0	5	1	-4	5	10	5	10	10	0	10	10	0	10	5	-5	10	10	0			real stretch	5	5	0	10	10	0	10	10	0	5	1	-4	5	10	5		0
5	40	30	-10	30	30	0	50	20	-30	10	0	-10	20	20	0	30	10	-20	10	30	20	20	20	0			real stretch	40	30	-10	20	20	0	10	30	20	50	20	-30	10	0	-10		0
6	30	25	-5	30	25	-5	30	30	0	30	30	0	30	30	0	30	20	-10	30	30	0	30	30	0			real shrink	30	25	-5	30	30	0	30	30	0	30	30	0	30	30	0		0
7	45	20	-25	45	40	-5	40	35	-5	50	40	-10	40	40	0	40	35	-5	20	10	-10	10	10	0			real stretch	45	20	-25	40	40	0	20	10	-10	40	35	-5	50	40	-10		1
8	20	0	-20	0	0	0	20	20	0	20	0	-20	40	30	-10	40	40	0	0	0	0	0	0	0			real stretch	20	0	-20	40	30	-10	0	0	0	20	20	0	20	0	-20		1
9	40	60	20	70	50	-20	30	20	-10	60	60	0	40	40	0	70	60	-10	70	50	-20	60	60	0			real shrink	70	50	-20	70	60	-10	60	60	0	60	60	0	30	20	-10		1
10	25	25	0	10	10	0	30	15	-15	20	30	10	15	10	-5	10	10	0	30	30	0	30	0	-30			real stretch	25	25	0	15	10	-5	30	30	0	30	15	-15	20	30	10		1
11	10	10	0	10	20	10	0	0	0	10	0	-10	10	10	0	10	10	0	0	10	10	10	10	0			real stretch	10	10	0	10	10	0	0	10	10	0	0	0	10	0	-10		1
12	40	45	5	25	25	0	45	40	-5	35	40	5	40	47	7	25	35	10	40	25	-15	50	40	-10			real shrink	25	25	0	25	35	10	50	40	-10	35	40	5	35	40	5		1
[truncated: 7 more columns]

## Sheet: Sustained illusions
Session 1									Session 3
Part number	Sustained_post_pain_immediate	Pain_30	Pain_60	Pain_90	Pain_120	Pain_150	Pain_180		Sustained_post_illusion_pain	Sustained_Pain_180
1	10	13	14	15	14	16	16		15	15
2	54	54	54	53	52	52	52		52	50
3	20	20	20	20	25	25	25		25	25
4	5	2	1	1	1	2	2		2	0
5	20	20	20	20	30	20	20
6	30	35	35	35	35	40	40		35	40
7	40	50	60						40	50
8	20	10	10	0	0	0	0
9	60	40	40	30	50	40	30
10	30	35	30	30					30	30
11	0	0
12	25	25	27.5	20	20	20	15		20	17.5

## Sheet: Repeated illusions
	Session 1																					Session 2
Participant number	Illusion1_pre	Illusion1_post	Illusion2_pre	Illusion2_post	Illusion3_pre	Illusion3_post	Illusion4_pre	Illusion4_post	Illusion5_pre	Illusion5_post	Illusion6_pre	Illusion6_post	Illusion7_pre	Illusion7_post	Illusion8_pre	Illusion8_post	Illusion9_pre	Illusion9_post	Illusion10_pre	Illusion10_post		Illusion1_pre	Illusion1_post	Illusion2_pre	Illusion2_post	Illusion3_pre	Illusion3_post	Illusion4_pre	Illusion4_post	Illusion5_pre	Illusion5_post	Illusion6_pre	Illusion6_post	Illusion7_pre	Illusion7_post	Illusion8_pre	Illusion8_post	Illusion9_pre	Illusion9_post	Illusion10_pre	Illusion10_post
1	30	20	15	15	15	12	10	8	10	8	10	7	9	5	10	5	8	2	10	2		32	27	25	21	24	16	17	14	14	13	15	14	12	10	12	10	10	8	10	10
2	45	40	43	42	43	43	46	47	46	46	45	46	47	45	45	44	44	45	45	46		76	74	73	72	72	70	71	70	70	70	69	69	69	69	70	69	69	68	69	68
3	20	15	15	15	20	20	20	15	15	15	15	15	15	15	15	15	15	15	15	15
4
5																						80	60	60	60	50	50	50	50	50	60	60	50	60	50	50	50	40	40	40	40
6	20	20	20	20	20	15	20	15	20	15	20	20	20	20	20	15	20	20	20	20		25	25	25	23	25	25	25	23	25	27	25	25	25	23	25	25	25	25	25	25
7																						20	10	30	40	40	50	40	30	20	20	42	20	15	15	15	10	0	10	5	5
8
9
10
11	25	25	25	10	25	25	25	10	10	10	10	10	10	10	10	10	25	10	40	20		60	60	60	60	60	60	60	75	60	50	50	40	45	45	40	40	40	40	45	40
12	50	20	40	20	20	15	12	10	10	15	10	12	0	0	0	8	0	0	0	0		60	40	40	47.5	45	40	50	35	35	40	35	30	30	30	25	35	30	30	25	25

## Sheet: Daily pain scores
Participant number	Baseline_pain last 48 hrs	Pain last 48hrs after session 2	Pain last 48 hrs just prior to session 3
1	47.5	35	31.5
2	50	66	72.5
3	10	15	20
4	13
5	80	55	90
6	40	50	72.5
7	30	40	50
8	50
9	60
10	35
11	75
12	85	55	70
